# Supplementary material
Source: PubMed Central journal article supplement (PMC6440777)
Supplement: JCM.01913-18-s0001.pdf [file JCM.01913-18-s0001.pdf]

## Supplement 1

**Supplementary table 1. Contingency tables of the lateral flow device in cases with proven invasive pulmonary aspergillosis ('disease') versus controls with no signs of IPA ('no disease').**

|                         | Disease | No disease |                          | Disease | No disease |
|-------------------------|---------|------------|--------------------------|---------|------------|
| Visual readout positive | 9       | 17         | Digital readout positive | 9       | 5          |
| Visual readout negative | 2       | 107        | Digital readout negative | 2       | 119        |

**Supplementary table 2. Contingency tables of the lateral flow device in cases with proven or probable invasive pulmonary aspergillosis ('disease') versus controls with no signs of IPA ('no disease'). Cutoff for galactomannan optical index  $\geq 1.0$ .**

|                         | Disease | No disease |                          | Disease | No disease |
|-------------------------|---------|------------|--------------------------|---------|------------|
| Visual readout positive | 56      | 17         | Digital readout positive | 57      | 17         |
| Visual readout negative | 23      | 107        | Digital readout negative | 22      | 107        |

**Supplementary table 3. Contingency tables of the lateral flow device in cases with proven or probable invasive pulmonary aspergillosis ('disease') versus controls with no signs of IPA ('no disease'). Cutoff for galactomannan optical index  $\geq 0.5$ .**

|                         | Disease | No disease |                          | Disease | No disease |
|-------------------------|---------|------------|--------------------------|---------|------------|
| Visual readout positive | 59      | 17         | Digital readout positive | 59      | 17         |
| Visual readout negative | 32      | 107        | Digital readout negative | 32      | 107        |

**Supplementary table 4. Contingency tables of the lateral flow device in cases with proven or probable invasive pulmonary aspergillosis ('disease') versus controls with no signs of IPA ('no disease'). Galactomannan excluded as mycological criterion.**

|                         | Disease | No disease |                          | Disease | No disease |
|-------------------------|---------|------------|--------------------------|---------|------------|
| Visual readout positive | 25      | 17         | Digital readout positive | 27      | 23         |
| Visual readout negative | 8       | 107        | Digital readout negative | 6       | 101        |
